# Supplementary material
Source: PubMed Central journal article supplement (PMC5052556)
Supplement: ACI-07-0883-s001.pdf [file ACI-07-0883-s001.pdf]

Name: Last, First; MR#: XXXXXXXXXXXX

**PULMONARY EMBOLISM SEVERITY INDEX (PESI) **

|                        | YES                              | NO                               | Age: <input type="text" value="35"/> |                            | YES                              | NO                               |
|------------------------|----------------------------------|----------------------------------|--------------------------------------|----------------------------|----------------------------------|----------------------------------|
| Altered Mental Status: | <input type="radio"/>            | <input checked="" type="radio"/> |                                      | Temperature <36° C:        | <input type="radio"/>            | <input checked="" type="radio"/> |
| Male:                  | <input type="radio"/>            | <input checked="" type="radio"/> |                                      | Respiratory Rate ≥ 30/min: | <input checked="" type="radio"/> | <input type="radio"/>            |
| Cancer:                | <input type="radio"/>            | <input checked="" type="radio"/> |                                      | Heart Rate ≥ 110/min:      | <input type="radio"/>            | <input checked="" type="radio"/> |
| Heart Failure:         | <input checked="" type="radio"/> | <input type="radio"/>            |                                      | Systolic BP <100 mmHg:     | <input checked="" type="radio"/> | <input type="radio"/>            |
| Lung Disease:          | <input type="radio"/>            | <input checked="" type="radio"/> |                                      | O2 Saturation <90%:        | <input type="radio"/>            | <input checked="" type="radio"/> |

DATA IMPORTED FROM HC. PLEASE CHECK, EDIT &amp; REFRESH AS NEEDED.

BACK

REFRESH

CONFIRM
