# Supplementary material
Source: PubMed Central journal article supplement (PMC5052556)
Supplement: ACI-07-0883-s002.pdf [file ACI-07-0883-s002.pdf]

Name: Last, First; MR#: XXXXXXXXXX

PESI Points

85

PESI Class

II

| Point Sum | PESI Class | Approx 30 day Mortality | Site of initial care               |
|-----------|------------|-------------------------|------------------------------------|
| ≤ 64      | I          | < 2%                    | Outpt management is often possible |
| 65-85     | II         | < 2%                    | Outpt management is often possible |
| 86-105    | III        | ~ 5%                    | Inpatient care is often indicated  |
| 106-125   | IV         | ~ 10%                   | Inpatient care is often indicated  |
| ≥ 126     | V          | ~ 20%                   | Inpatient care is often indicated  |

BACK

NEXT
